# Supplementary material
Source: Springer Nature journal article supplement (https://www.springermedizin.de/resource/supplementary/12888_2013_1837_MOESM1_ESM.pdf/9481436)
Supplement: MOESM1 [file 9481436]

Enrolled in trial n=63

```
graph TD; A[Enrolled in trial n=63] --> B[Randomised and started treatment n=61 (97%)]; A --> C[Randomised but did not start treatment n=2 (3%)]; B --> D[Completed to 15 weeks of treatment n=55 (87%)]; B --> E[Started treatment but did not completed to 15 weeks n=6 (9.5%)]; D --> F[Completed ≥30 treatment (32 weeks) n=48 (76%)]; D --> G[Completed 15-29 weeks of treatment n=7 (11%)];
```

Randomised and started treatment

n=61 (97%)

Randomised but did not start

treatment n=2 (3%)

Completed to 15 weeks of

treatment n=55 (87%)

Started treatment but did not

completed to 15 weeks n=6 (9.5%)

Completed  $\geq 30$  treatment

(32 weeks) n=48 (76%)

Completed 15-29 weeks of

treatment n=7 (11%)
